# Supplementary material for: Asymmetric synthesis of avenaciolide via cascade palladium catalysed cyclisation–carbonylation of bromodienes
Source: Royal Society of Chemistry journal article supplement (doi:10.1039/b403183k), 2004-01-01
Supplement: b403183k.doc [file b403183k.doc]

Asymmetric Synthesis of Avenaciolide via Palladium Catalysed Cyclisation-Carbonylation of Bromodienes

Varinder K. Aggarwal,* Paul W. Davies and Andreas T. Schmidt

School of Chemistry, Bristol University, Cantock’s Close, Bristol, UK BS8 1TS.

E-mail: v.aggarwal@bristol.ac.uk; Fax: +44 (0)117 929 8611; Tel: +44 (0)117 954 6315

# Supplementary information: experimental

## General directions

Chromatography: Flash chromatography was performed on silica gel (Merck Kiesegel 60, 230-400 mesh). TLC was performed on aluminium backed silica plates (60F254, 0.2 mm) which were developed using standard visualising agents: UV fluorescence (254 and 366 nm), phosphomolybdic acid/∆, anisaldehyde/∆, permanganate/∆. Melting points were determined on a Kofler hot stage. Infrared spectra were recorded on a Perkin-Elmer Spectrum One FT-IR spectrometer. Only selected absorbencies (max) are reported. 1H NMR spectra were recorded at 270 or 400 MHz on Jeol Delta GX/270 or Jeol Delta GX/400 instruments, respectively. Chemical shifts (H) are quoted in parts per million (ppm), referenced to TMS, *J* values are given in Hz. 13C NMR spectra were recorded at 67 or 101 MHz on Jeol Delta GX/270 or Jeol Delta GX/400 instruments, respectively. Chemical shifts (C) are quoted in parts per million (ppm), referenced to the appropriate residual solvent peak and are assigned as s, d, t, q for C, CH, CH2, CH3. Degenerate peaks are prefixed by the number of carbons. Low resolution mass spectra (*m/z*) were recorded on a Micromass Analytical Autospec spectrometer with only molecular ions M+ and major peaks being reported with intensities quoted as percentages of the base peak. High-resolution mass spectra were recorded on a Micromass Analytical Autospec spectrometer. All chemicals were purchased from Aldrich, Fluka, Lancaster or Strem and used as received unless otherwise mentioned. Anhydrous THF, CH2Cl2, and acetonitrile were obtained from a purification column composed of activated alumina (A-2).1 Other anhydrous solvents were used as obtained from Aldrich. All reactions were performed in dry glassware under an inert atmosphere of either argon or nitrogen. Reactions at elevated pressure were performed in an Intek MR7 reactor vessel fitted with glass liners containing magnetic stirrer bars. Heating was achieved using a Haake DC30 oil circulating system with the reaction vessel placed on a stirrer plate. 99.0+% pure carbon monoxide was used (Aldrich). **2**2, **7**3 and **16**4 are known compounds. Spectral data is provided for previously unknown compounds.

## Experimental procedures

**(2*R*,3*R*)-3-Octyloxiranemethanol 16**

D(-)-diethyl tartrate (250 µl, 1.5 mmol) and titanium tetraisopropylate (375 µl, 1.25 mmol) were added to a suspension of molecular sieves (4 Å, powdered, 2.00 g) in CH2Cl2 (50 mL) at -5 °C. The mixture was cooled down to -20 °C, *tert*-butyl hydroperoxide (5 M solution in decane, 7.5 mL, 37.5 mmol) was added and the mixture was stirred for 30 min. A solution of *trans*-2-undecen-1-ol **7** (3.40 g, 20.0 mmol) in CH2Cl2 (10 ml) was slowly added and the mixture was stirred for 90 min at -10 °C. Water (10 ml) was then added and the mixture was stirred for 30 min at room temperature. Sodium hydroxide (30% solution in brine, 5 mL) was added. The phases were separated and the aqueous phase was extracted with CH2Cl2 (3 × 20 ml). The organic extracts were combined, dried over magnesium sulfate, filtered and the solvent removed under reduced pressure. The crude product was recrystallised from *n*-pentane (10 mL), giving the *epoxide* **16** as white needles (3.19 g, 17.1 mmol, 86 %). The enantioselectivity (90 % ee) was determined by NMR analysis of the Mosher ester.4

**(*R*)-1-Undecen-3-ol 7**

Triethylamine (3.35 mL, 24 mmol) and tosyl chloride (3.24 g, 17 mmol) were added to a solution of the epoxide **16** (2.98 g, 16 mmol) and DMAP (40 mg, 0.32 mmol) in CH2Cl2 (20 mL) at 0 °C. The mixture was stirred at 0 °C for 18 h, water (20 mL) was then added and the phases were separated. The aqueous phase was extracted with CH2Cl2 (3 × 25 ml). The organic extracts were combined, washed with NaHCO3 (10 % solution), dried over sodium carbonate, filtered and the solvent removed under reduced pressure, giving the tosylate as a colourless oil (5.01 g, 92 %). The residue was taken up in acetone (80 mL) and DMF (13 mL). Potassium iodide (7.29 g, 44 mmol) was added and the mixture was stirred under reflux for 90 minutes. Then the mixture was cooled down to 0 °C, triphenyl phosphine (3.93 g, 15.0 mmol) and iodine (372 mg, 1.46 mmol) were added and the suspension was stirred for 1 h at 0 °C. Water (50 mL) was added, the phases separated and the aqueous phase extracted with ether (3 x 50 mL). The organic extracts were combined, washed with Na2S2O3 (5 % solution) and brine, dried over magnesium sulfate, filtered and the solvent removed under reduced pressure. The residue was taken up in 10 mL ether, filtered and the solvent removed under reduced pressure. The resulting oil was subjected to flash chromatography eluting in 15 % ethyl acetate:petrol to afford the *alcohol* **7** as a colourless oil (1.38 g, 8.0 mmol, 55 %), R*f* 0.45 (15 % ethyl acetate:petrol).

#### (*R*)-3-(2-Bromoallyloxy)undec-1-ene 6

Sodium hydride (60 % dispersion in oil, 680 mg, 17.0 mmol) was carefully added to 2,3-dibromopropene (3.00 g, 15.0 mmol) and the mixture was stirred vigorously until an even distribution was achieved. **7** (1.28 g, 7.5 mmol) was then added cautiously and the mixture stirred at ambient temperature for 6 d. Et2O (50 mL) was then added and the solution washed with saturated ammonium chloride (40 mL), water (25 mL) and brine (25 mL) before being dried over magnesium sulfate, filtered and the solvent removed under reduced pressure. The resulting oil was subjected to flash chromatography eluting in 0-1 % Et2O:petrol to afford the *bromo-diene* **6** as a colourless oil (2.02 g, 7.0 mmol, 93 %), R*f* 0.45 (petrol); max (neat)/cm-1 2923, 2854, 1640, 1077;  (400 MHz; CDCl3) 0.88 (3H, t, *J* 6.8, CH3), 1.20-1.56 (13H, m, alkyl chain CH2), 1.56‑1.70 (1H, m, C*H*H), 3.73 (1H, dt, *J* 7.3 and 6.9, CHO), 3.98 (1H, d, *J* 14.6, OC*H*H), 4.12 (1H, d, *J* 14.6, OCH*H*), 5.15-5.24 (2H, m, CH=C*H*2), 5.58 (1H, s, CBr=C*H*H), 5.66 (1H, ddd, *J* 17.6, 10.3 and 7.3, C*H*=CH2), 5.91 (1H, s, CBr=CH*H*); C (101 MHz; CDCl3) 14.1 (q), 22.7 (t), 25.4 (t), 29.3 (t), 29.6 (t), 29.6 (t), 31.9 (t), 35.5 (t), 72.1 (t), 81.0 (d), 117.1 (t), 117.5 (t), 130.2 (s), 138.6 (d); *m/z* (EI) 209 (M‑Br+, 10%), 175 (M-C8H17+, 100) (Found: C, 58.02; H, 8.74; Br, 27.39. C14H25BrO requires C, 58.13; H, 8.71; Br, 27.62).

#### (2*R*,3*R*)-(4-Methylene-2-octyltetrahydrofuran-3-yl)acetic acid methyl ester 5, (*R*)-2-(1-Octylallyloxymethyl)acrylic acid methyl ester 10

Bistriphenylphosphinepalladium chloride (8.8 mg, 0.0125 mmol), triphenylphosphine (13 mg, 0.05 mmol) and **6** (73 mg, 0.25 mmol) were added directly to the reaction tube under nitrogen. DMF (1.94 mL, 25 mmol), MeOH (0.51 mL, 12.5 mmol), H2O (22.5 L, 1.25 mmol) and triethylamine (140 L, 1 mmol) were then added. The solution was degassed *via* 2 freeze-vacuum-thaw cycles, backfilling with nitrogen. The reaction tube was placed in the reaction vessel and the vessel sealed. The vessel was pressurised to 2 atm. with CO and vented, repeating twice. The vessel was pressurised to 2 atm. and then heated at 85 ºC for 24 h with stirring. On cooling the mixture was taken up in water (10 mL) and extracted with Et2O (3  5 ml). The organic extracts were combined, dried over magnesium sulfate, filtered and the solvent removed under reduced pressure. Purification by column chromatography eluting in 5 % Et2O:petrol afforded the *ester* **5** as a mixture of diastereomers as a colourless oil (40.9 mg, 15.3 mmol, 61 %), R*f* 0.25 (5 % Et2O:Petrol); max (neat)/cm-1 2925, 2854, 1740, 1161, 887; Major diastereomer  (400 MHz; CDCl3) 0.88 (3H, t, *J* 6.8, CH3), 1.20-1.60 (14 H, m, 7  CH2), 2.46‑2.50 (2H, m, C*H*2CO2CH3), 2.69-2.77 (1H, m, OCHC*H*), 3.65 (1H, dt, *J* 5.9 and 5.9, CHO), 3.70 (3H, d, *J* 0.7, CO2CH3), 4.29 (1H, dddd, *J* 14.0, 2.2, 1.8 and 1.8, C*H*HO), 4.38 (1H, br d, *J* 14.0, CH*H*O), 4.92 (1H, dt, *J* 2.2 and 2.2, C=C*H*H), 4.95 (1H, td, *J* 2.2 and 1.8, C=CH*H*); C Major diastereomer (101 MHz; CDCl3) 14.1 (q), 22.7 (t), 26.0 (t), 29.3 (t), 29.6 (t), 29.7 (t), 31.9 (t), 34.0 (t), 36.9 (t), 45.1 (d), 51.7 (q), 70.2 (t), 84.5 (d), 104.5 (t), 151.4 (s), 172.6 (s); *m/z* (CI) 267 (M-H+, 12%), 251 (31), 237 (27), 177 (54), 57 (100) (Found: C, 71.92; H, 10.45. C16H28O3 requires C, 71.60; H, 10.52).

A small amount of the linear *ester* **10** was isolated, with a small amount of contamination from the cyclic compound, as a colourless oil (4.6 mg, 0.017 mmol, 7 %), R*f* 0.45 (5 % Et2O:Petrol); max (neat)/cm-1 2925, 2855, 1729, 1638;  (400 MHz; CDCl3) 0.88 (3H, t, *J* 7.0, CH3), 1.20-1.70 (14 H, m, 7  CH2), 3.70 (1H, br m, CHO), 3.76 (3H, d, *J* 1.1, CO2CH3), 4.04 (1H, br d, *J* 14.3, CH*H*O), 4.24 (1H, br d, *J* 14.3, C*H*HO), 5.17 (1H, br d, *J* 1.1, CH=C*H*H), 5.20 (1H, br d, *J* 2.9, CH=CH*H*), 5.67 (1H, m, C*H*=CHH), 5.89 (1H, m, C=C*H*H), 6.28 (1H, m, C=CH*H*); C (101 MHz; CDCl3) 14.1 (q), 22.7 (t), 25.4 (t), 29.3 (t), 29.6 (t), 29.6 (t), 31.9 (t), 35.5 (t), 51.8 (q), 66.5 (t), 81.5 (d), 117.0 (t), 125.6 (t), 137.9 (s), 166.2 (s), 139.0 (d); *m/z* (EI) 268 (M+, 5%), 155 (48), 97 (57), 83 (62), 69 (78), 55(100).

#### (2*R*,3*R*)(2-Octyl-4-oxotetrahydrofuran-3-yl)acetic acid methyl ester 14

Ozone was bubbled through a glass frit into a solution of *alkene* **5** (1.20 g, 4.48 mmol) in CH2Cl2 (90 mL) at -78 C until the solution became blue. Nitrogen was bubbled through the solution for 5 min and then dimethylsulfide (389 mg, 6.27 mmol) added and the solution allowed to warm to ambient temperature with stirring overnight. The solvent was then removed under reduced pressure and the residue taken up in THF (100 mL). DBU (0.68 g, 4.48 mmol) was added and the solution heated to reflux for 3 h. The solution was allowed to cool, washed with water (100 mL) and brine (30 mL) before being dried over magnesium sulfate, filtered and the solvent removed under reduced pressure. The resulting oil was subjected to flash chromatography eluting in 10 % Et2O:petrol to afford the *ketone* **14** as a colourless oil (0.834 g, 3.09 mmol, 69 %), R*f* 0.25 (10 % Et2O:Petrol); max (neat)/cm-1 2925, 2855, 1762, 1738;  (400 MHz; CDCl3) 0.88 (3H, t, *J* 7.0, CH3), 0.80-1.78 (14H, m, 7  CH2), 2.41 (1H, dt, *J* 5.0 and 5.0, OCH), 2.63 (2H, d, *J* 5.3, C*H*2CO2CH3), 3.70 (3H, s, CO2CH3), 3.95 (1H, d, *J* 17.1, C*H*HC=O), 3.93-4.00 (1H, m, CHC=O), 4.17 (1H, dd, *J* 17.1, CH*H*C=O); C (101 MHz; CDCl3) 14.1 (q), 22.7 (t), 25.3 (t), 29.3 (t), 29.5 (t), 29.7 (t), 30.9 (t), 31.9 (t), 34.5 (t), 49.0 (q), 52.0 (d), 71.2 (t), 82.0 (d), 171.6 (s), 215.4 (s); *m/z* (EI) 269 (M-H+, 28), 239 (32), 197 (82), 97 (97), 55 (100) (Found: M+H+, 271.1904. C15H27O4 requires M+H+, 271.1909).

#### (4*R*,3a*R*,6a*S*)-4-Octyltetrahydrofuro-[3,4-b]furan-2-one 3

L-Selectride (1 M solution in THF, 0.6 mL, 0.6 mmol) was added over a 5‑minute period to a solution of *ketone* **14** (135 mg, 0.5 mmol) in THF at –78 C. The solution was stirred at –78 C for 1 h and then HCl (1 M, 10 mL) added and the solution allowed to warm to ambient temperature with vigorous stirring. After stirring for 25 minutes the layers were separated and the aqueous layer extracted with CH2Cl2 (3 ´ 10 mL). The organic washings were combined before being dried over magnesium sulfate, filtered and the solvent removed under reduced pressure. The resulting oil was subjected to flash chromatography eluting in 10% EtOAc:hexanes to remove impurities and then 20 % EtOAc:hexanes to afford the *lactone* **3** as a pale yellow oil (84.4 mg, 0.35 mmol, 70 %) R*f* 0.25 (20 % EtOAc:petrol); max (neat)/cm-1 2925, 2855, 1777;  (400 MHz; CDCl3) 0.88 (3H, t, *J* 6.9, CH3), 1.20-1.70 (14H, m, 7  CH2), 2.42 (1H, dd, *J* 18.3 and 2.1, H3), 2.62 (1H, dddd, *J* 12.5, 9.3, 7.3 and 2.1, H2), 2.81 (1H, dd, *J* 18.3 and 9.3, H3'), 3.64 (1H, dt, *J* 12.5 and 7.0, H1), 3.92 (1H, dd, *J* 11.0 and 2.2, H5), 4.16 (1H, dd, *J* 11.0 and 5.2, H5'), 5.07 (1H, ddd, *J* 7.3, 5.2 and 2.2, H4); C (101 MHz; CDCl3) 14.1 (q), 22.7 (t), 25.9 (t), 29.2 (t), 29.5 (t), 29.6 (t), 31.9 (t), 32.9 (t), 33.7 (t), 44.5 (d), 72.2 (t), 84.4 (d), 85.1 (d), 176.1 (s); *m/z* (CI) 241 (M+H+, 50), 223 (75), 205 (30), 163 (100) (Found: M+H+, 241.1800. C14H25O3 requires M+H+, 241.1804).

#### (4*R*,3a*R*,6a*R*)-4-Octyldihydrofuro-[3,4-b]furan-2,6-dione 2

Acetonitrile (0.125 mL), carbon tetrachloride (0.125 mL) and water (0.188 mL) were added to a mixture of the *lactone* **3** (15 mg, 62.5 mol) and sodium periodate (55 mg, 0.2563 mmol). The triphasic mixture was rapidly stirred before ruthenium trichloride hydrate (0.6 mg, 3.125 mol) was added. The mixture was vigorously stirred at ambient temperature for 40 h with addition of ruthenium trichloride hydrate (3 portions of 0.4 mg) at various intervals as the ruthenium became deposited on the sides of the flask. The reaction was quenched when it appeared to be progressing no further, as seen by a change in colour, make up of the reaction layers and TLC, with addition of CH2Cl2. The solvent was removed under reduced pressure and the reaction mixture was purified by preparative TLC, eluting in 33 % EtOAc:hexanes to afford unreacted starting material (4.2 mg, 28 %) along with very small amounts of unidentified compounds and the desired bis-lactone **2** as a colourless oil (4.6 mg, 18.1 mol, 29 %, 40 % based on recovered of **3**), R*f* 0.25 (33 % EtOAc:hexanes).

#### (4-Methylene-2-octyltetrahydrofuran-3-yl)acetic acid methyl ester 15

A stirred mixture of pyridine (0.7 mL) in CH2Cl2 (8 mL) was treated with CrO3 (0.7 g, 7 mmol) and stirring continued for 20 min at ambient temperature. A solution of *alkene* **5** (94 mg, 0.35 mmol) in CH2Cl2 (1 mL) was added to the reaction mixture followed by the washings of the alkene (1 mL). After heating the solution to reflux for 1 h it was cooled and treated with saturated NaHCO3 (25 mL) and extracted with CH2Cl2 (3 ´ 10 mL). The combined organic layers were dried over magnesium sulfate, filtered and the solvent removed under reduced pressure. The resulting oil was subjected to flash chromatography eluting in 10% EtOAc:petrol affording the *lactone* **15** (63.2 mg, 0.224 mmol, 64%), R*f* 0.35 (10% EtOAc:petrol), max (neat)/cm-1 2925, 2855, 1736, 1762; H (400 MHz, CDCl3) 0.88 (3H, t, *J* 7.0, CH3), 1.20-1.58 (12H, m, 6 ´ CH2), 1.59-1.69 (2H, m, CH2), 2.60 (2H, d, *J* 7.0, C*H*2CO2CH3), 3.09-3.16 (1H, m, CCH), 3.72 (3H, s, OCH3), 4.24 (1H, dt, *J* 7.7 and 4.8, OCH), 5.66 (1H, d, *J* 2.6, C=C*H*H), 6.29 (1H, d, *J* 2.6, C=CH*H*); C (101 MHz, CDCl3) 14.1 (q), 22.7 (t), 25.0 (t), 29.2 (t), 29.3 (t), 29.4 (t), 31.9 (t), 35.7 (t), 38.3 (t), 40.8 (q), 52.0 (d), 82.9 (d), 123.0 (t), 138.3 (s), 169.6 (s), 171.3 (s); *m/z* (EI) 282 (M +, 5%), 264 (8), 250 (43), 209 (82), 189 (100) (Found: C, 68.04; H, 9.04. C16H26O4 requires C, 68.06; H, 9.28).

**References:**

1. A. B. Pangborn, M. A. Giardello, R. H. Grubbs, R. K. Rosen and F. J. Timmers, *Organometallics*, 1996, **15**, 1518.
2. E. Alcázar, M. Kassou, I. Matheu and S. Castillón, *Eur. J. Org. Chem.*, 2000, 2285.
3. A. V. Rama Rao, E. R. Reddy, A. V. Purandare and C. V. N. S. Varaprasad, *Tetrahedron*, 1987, **43**, 4385.
4. R. M. Hanson and K. B. Sharpless, *J. Org. Chem.*, 1986, 51, 1922.
